# Supplementary material for: The characterisation of shellac resin by flow injection and liquid chromatography coupled with electrospray ionisation and mass spectrometry
Source: PubMed Central journal article supplement (PMC5665916; doi:10.1038/s41598-017-14907-7), 2017-11-01

**The characterisation of shellac resin by flow injection and liquid chromatography coupled with electrospray ionisation and mass spectrometry**

Diego Tamburini<sup>1\*</sup>, Joanne Dyer<sup>1</sup>, Ilaria Bonaduce<sup>2</sup>

<sup>1</sup> Department of Scientific Research, The British Museum, Great Russell Street, WC1B 3DG, London, United Kingdom

<sup>2</sup> Department of Chemistry and Industrial Chemistry, University of Pisa, via G. Moruzzi 13, I-56124, Pisa, Italy

**Figure S1.** Total Ion Chromatograms (TICs) obtained by HPLC-ESI-Q-ToF analysis of the methanol extracts of samples **a) S0**, **b) S1** and **c) S2**. Labels refer to Table 1.

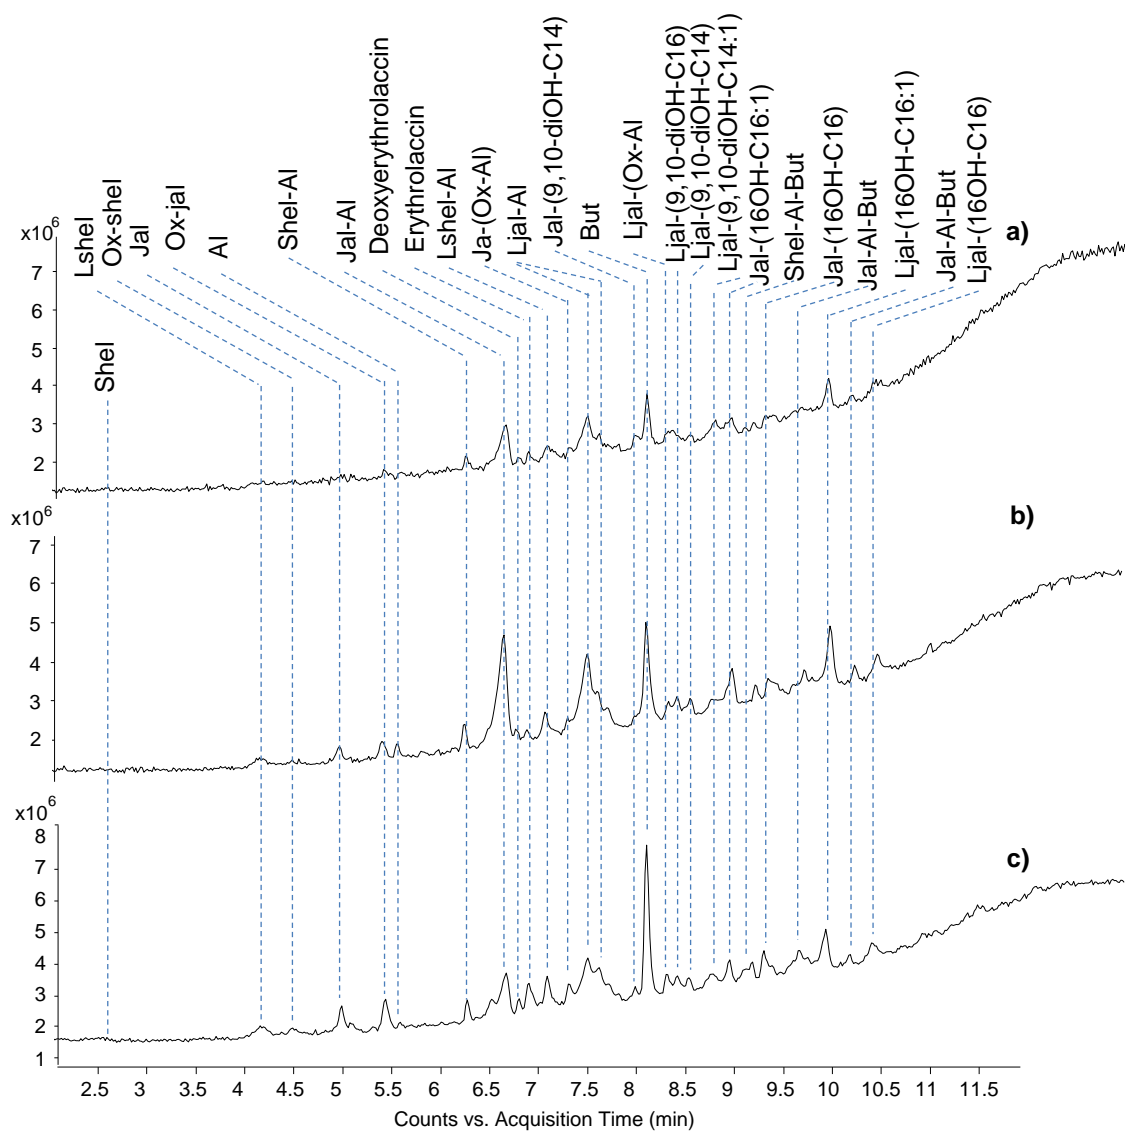

**Figure S2.** Comparison between chromatographic (top) and MS data (bottom) obtained for the reference of aleuritic acid (a) and the molecule identified in sample S0 (b), showing confirmation of the identification.

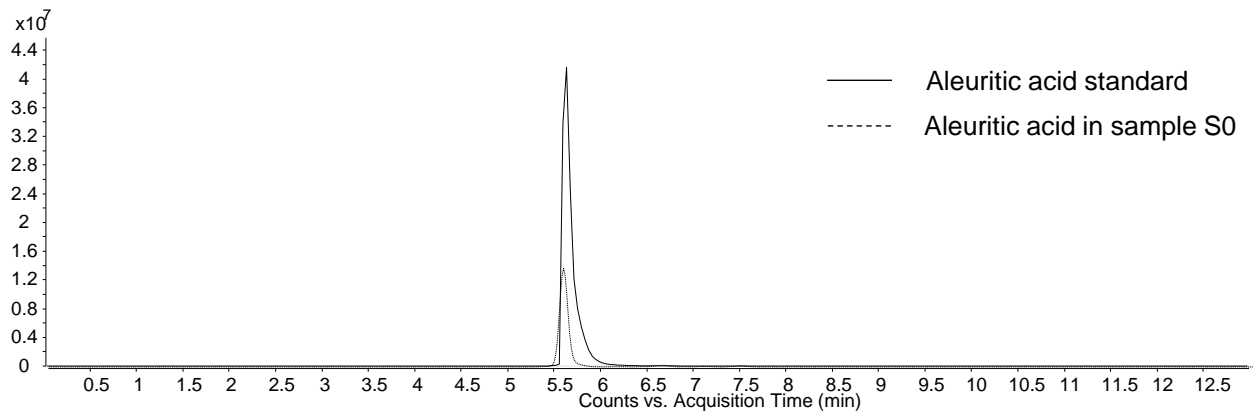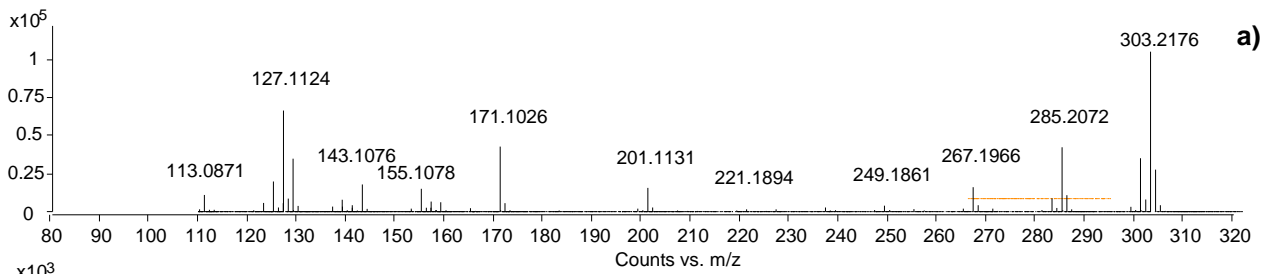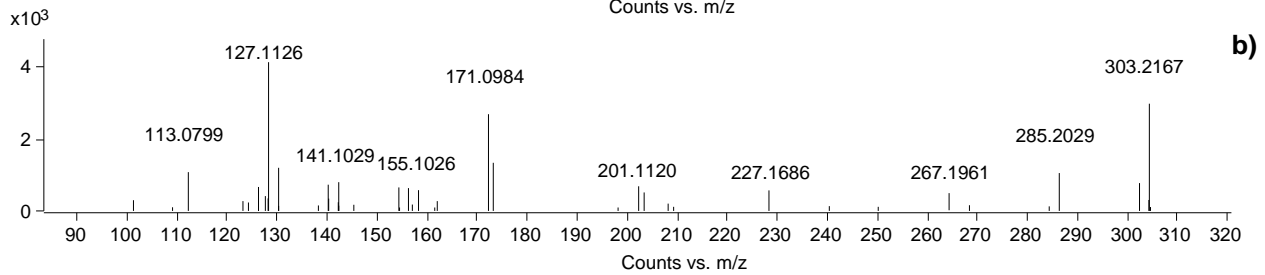

## Appendix - MS/MS spectra of shellac components acquired in negative ionisation mode

Variable collision energies in the range 20-40 V were adopted, mainly depending on the molecular weight of the molecules.

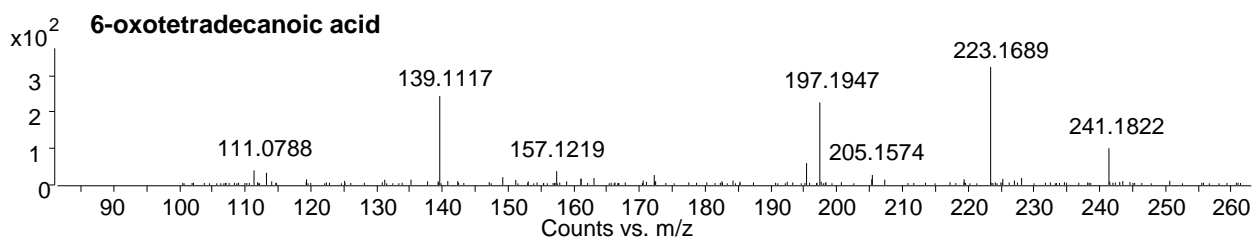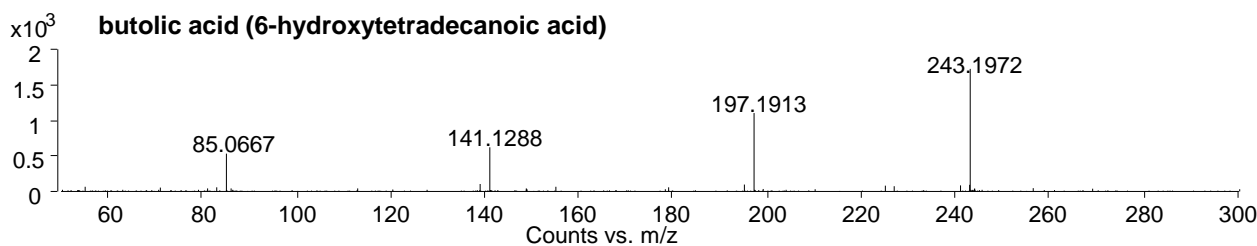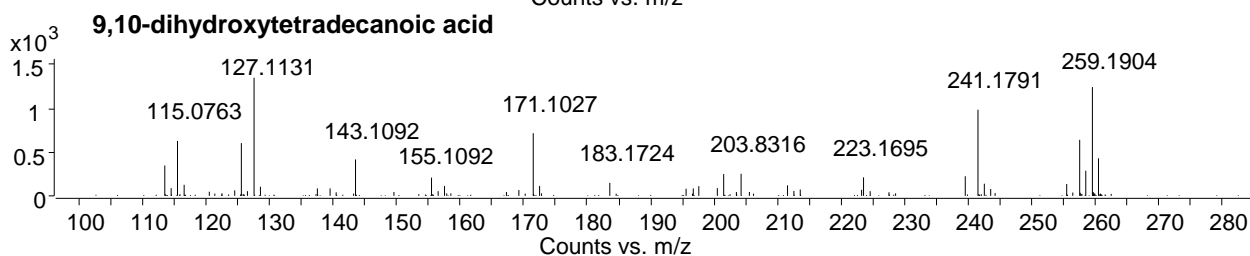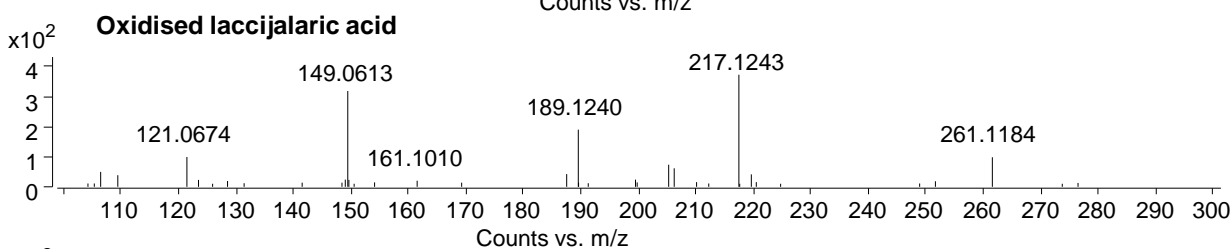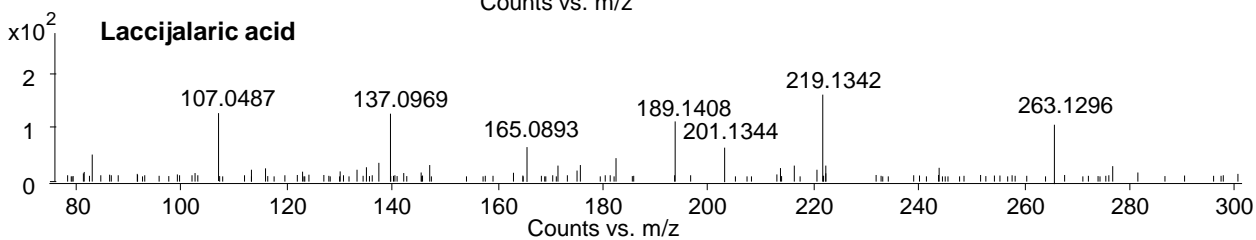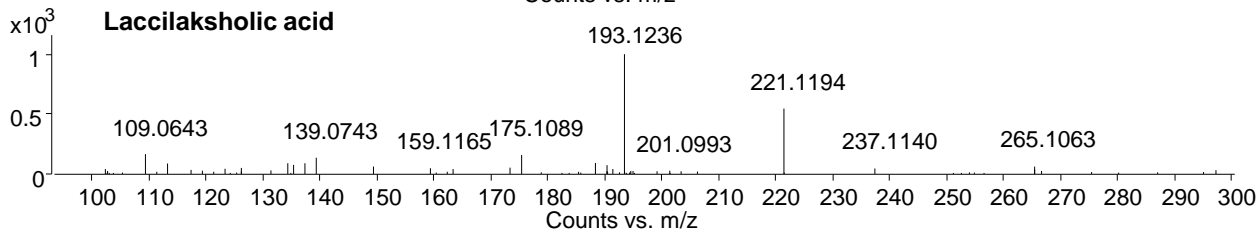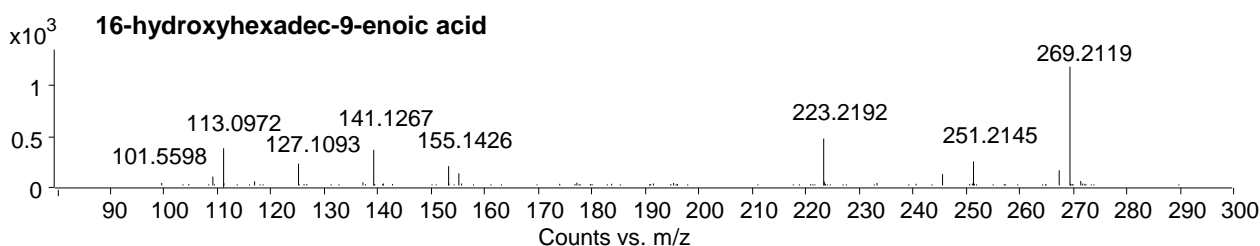

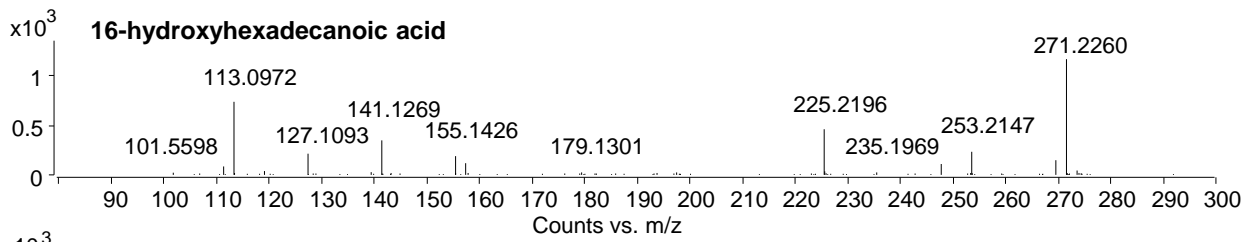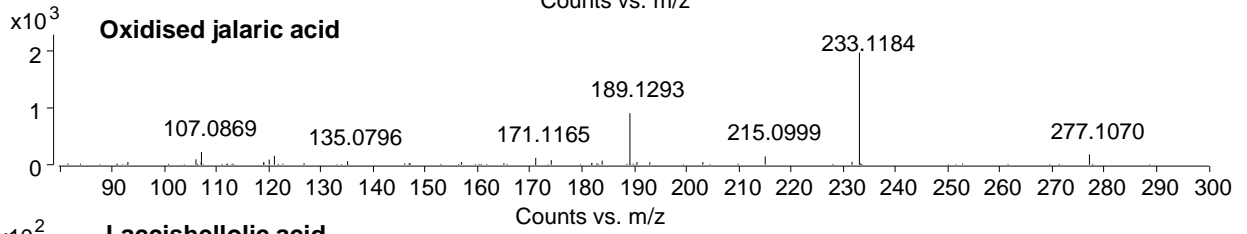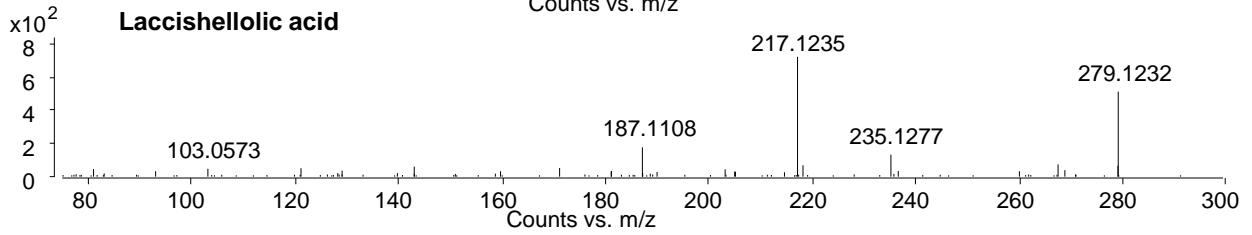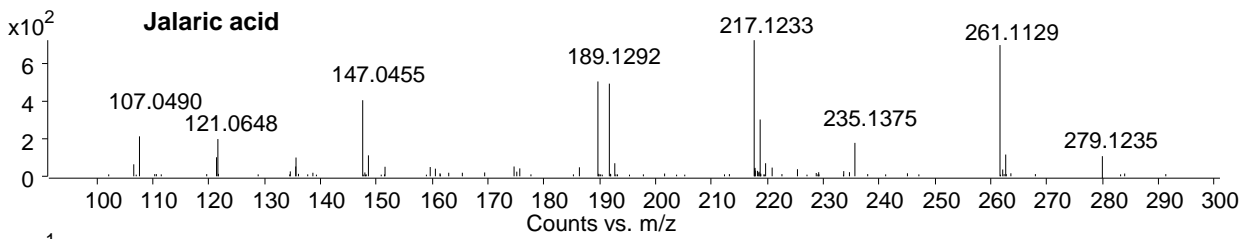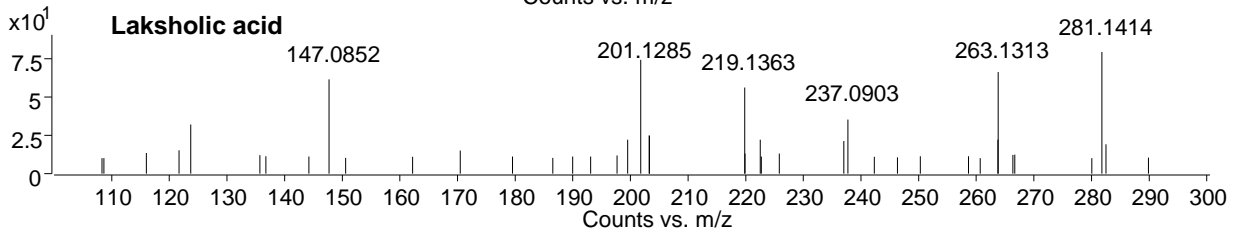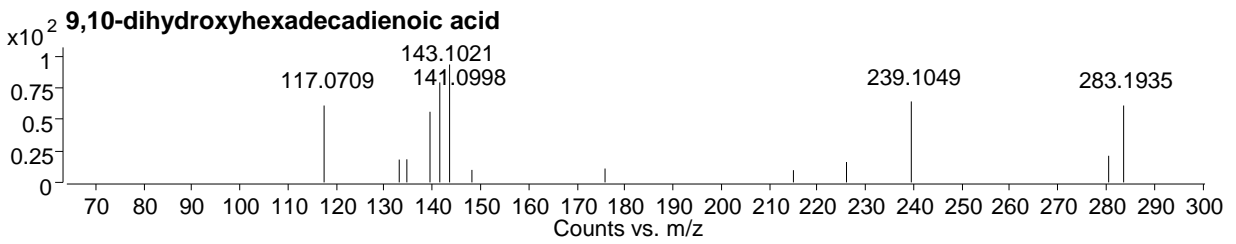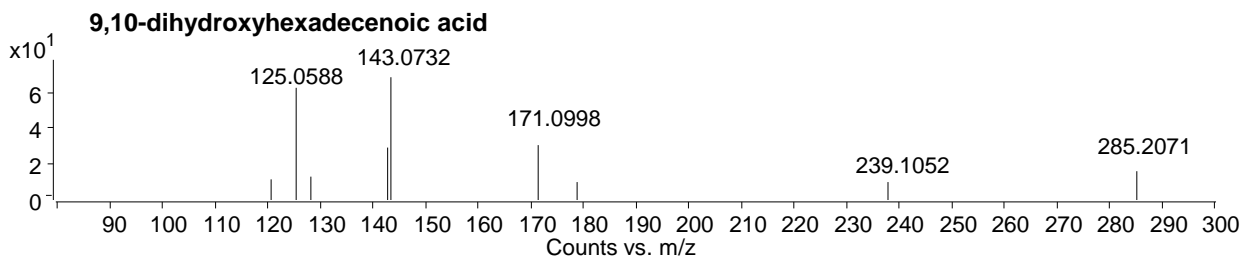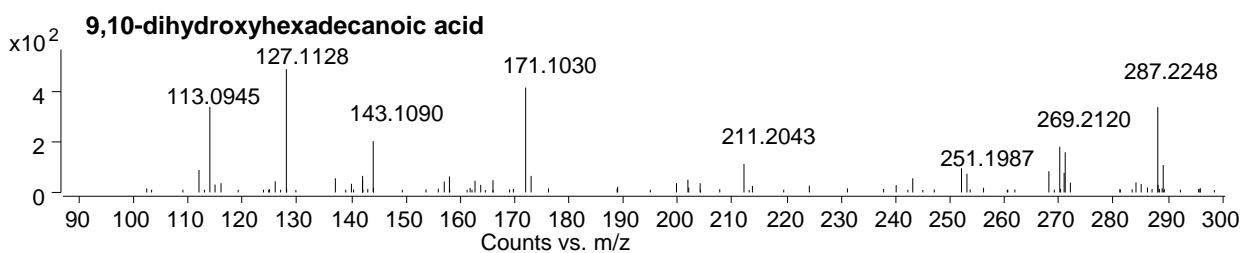

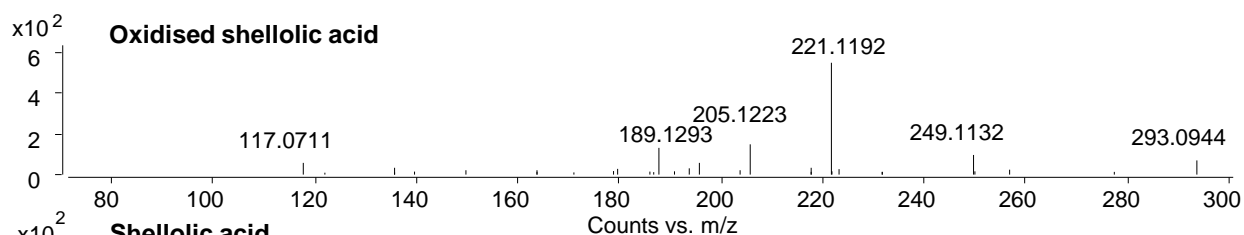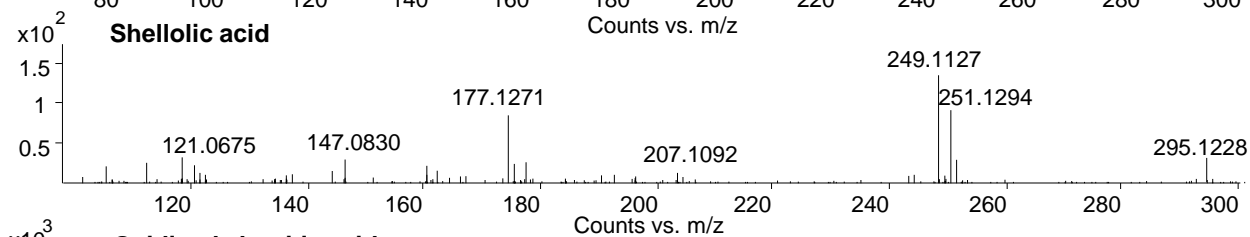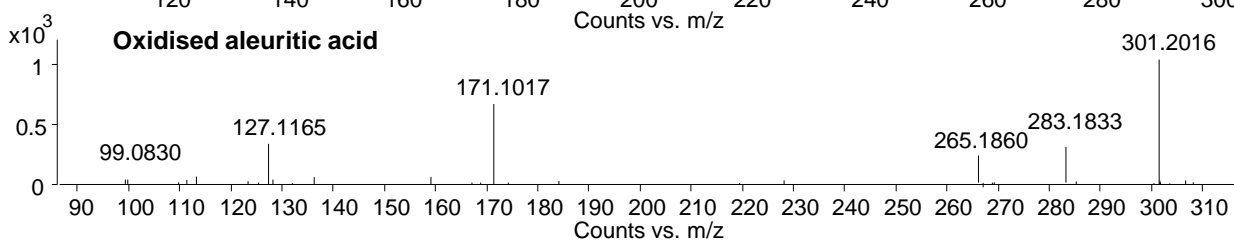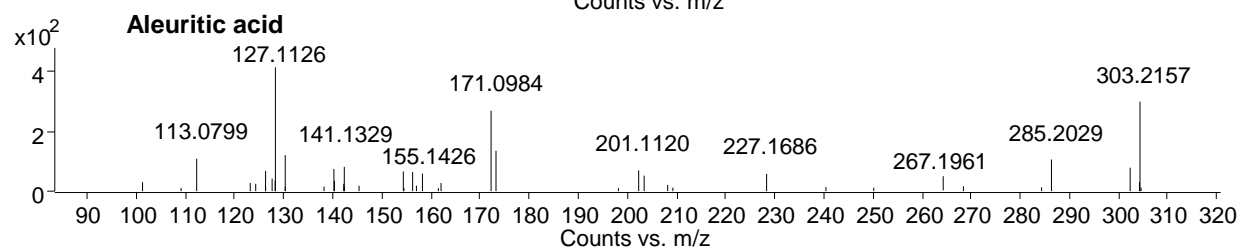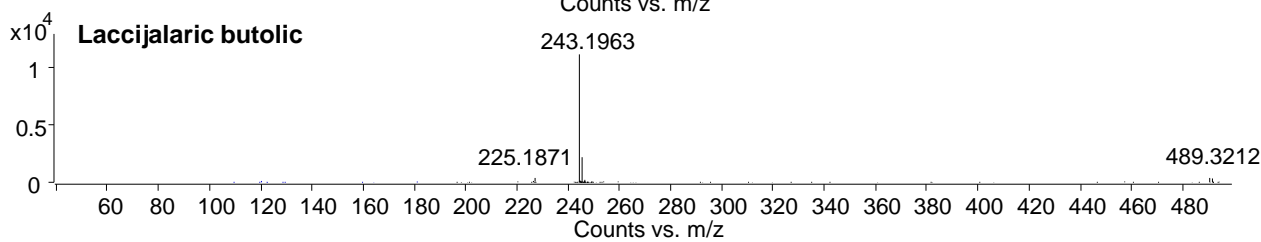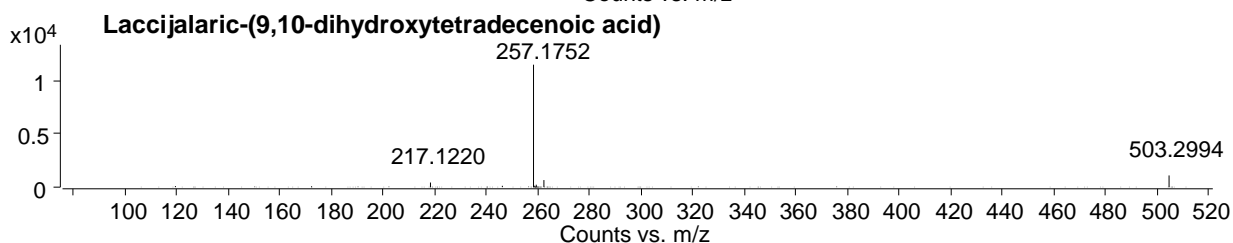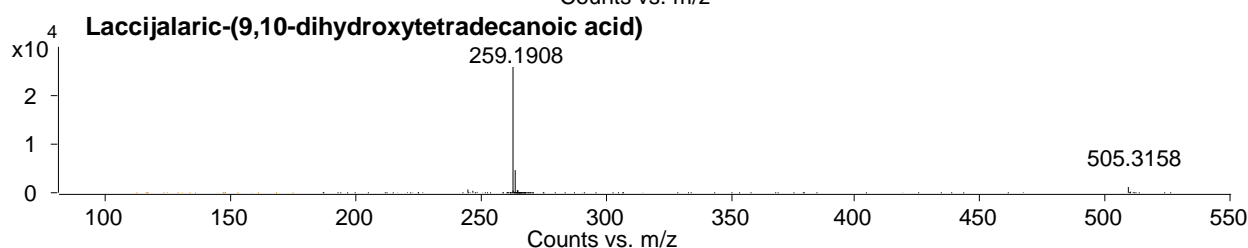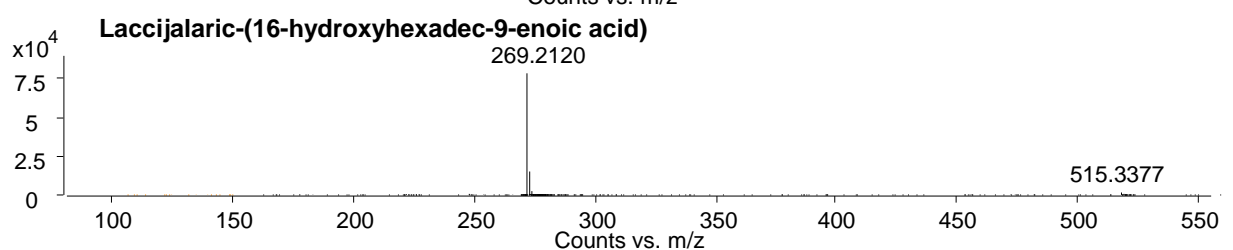

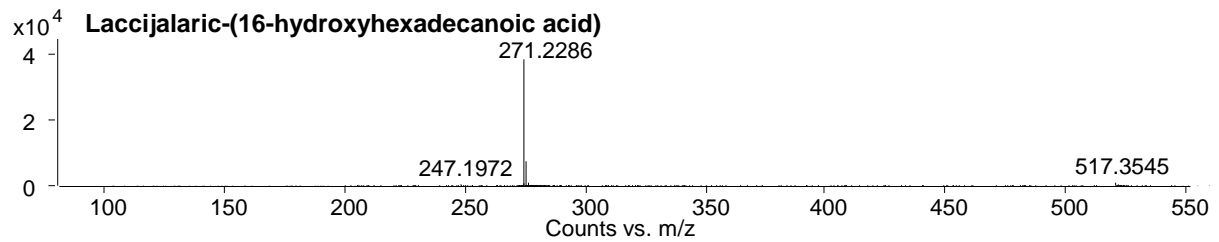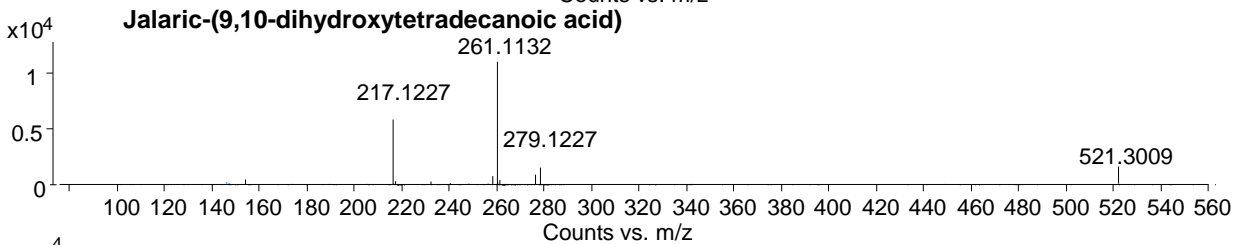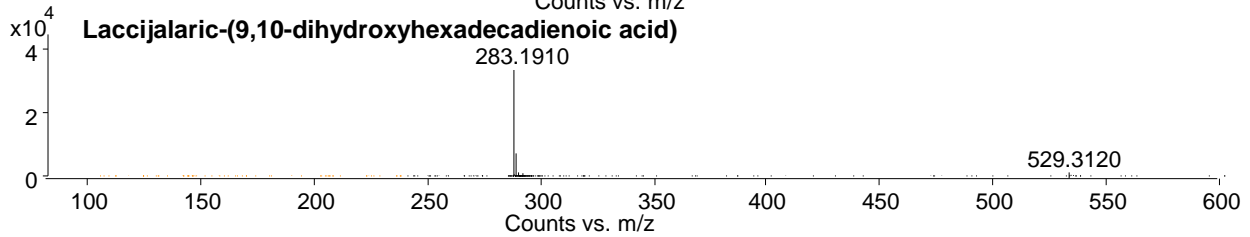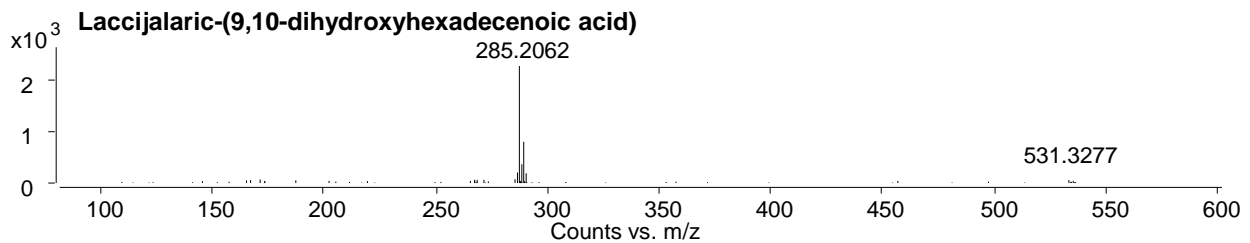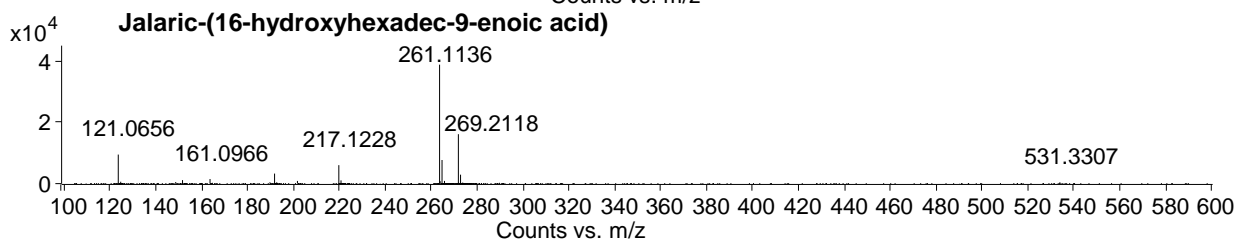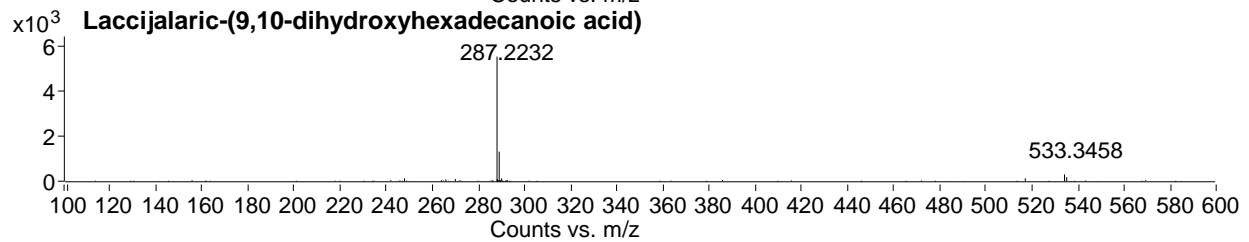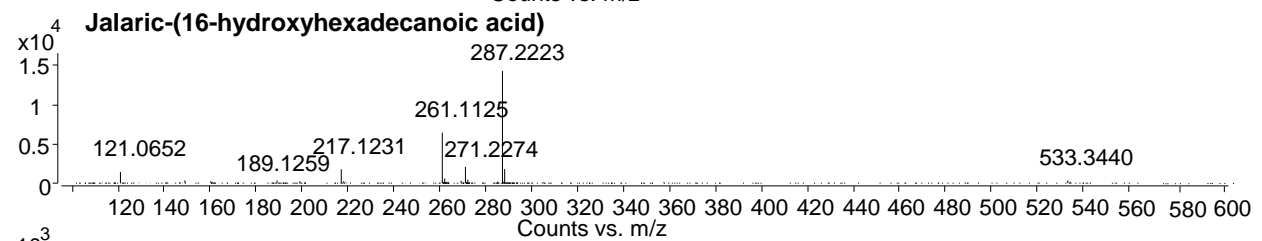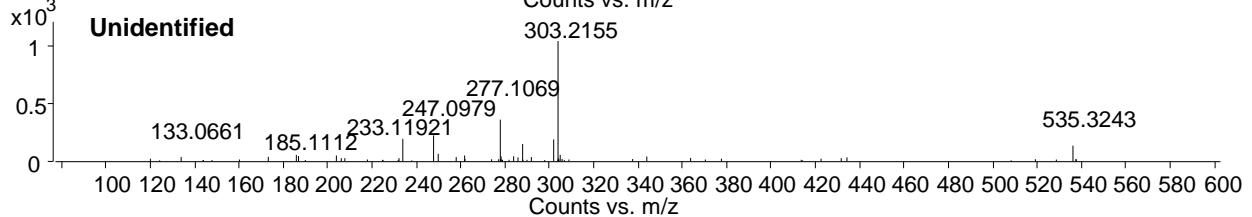

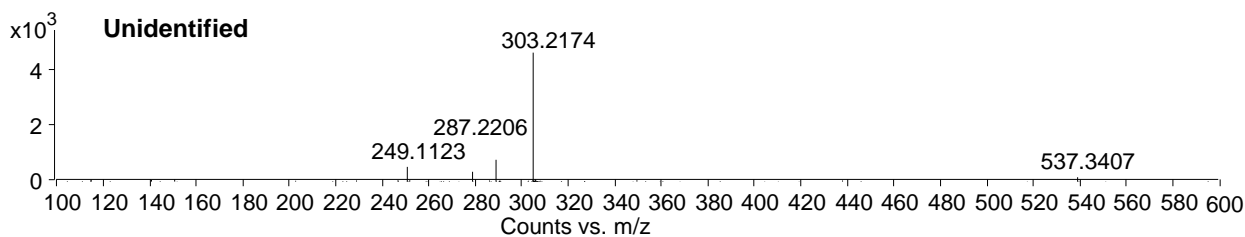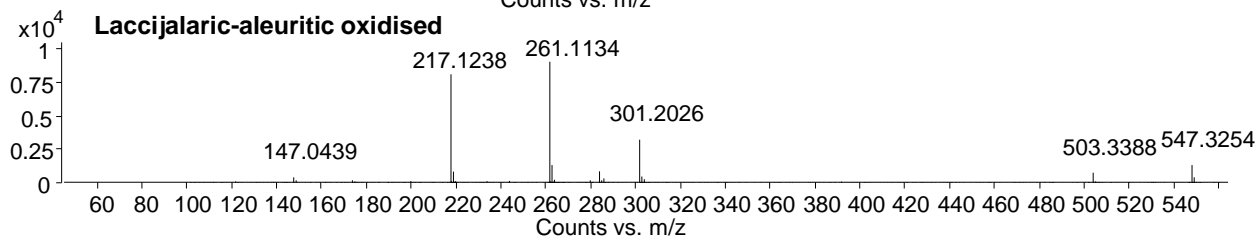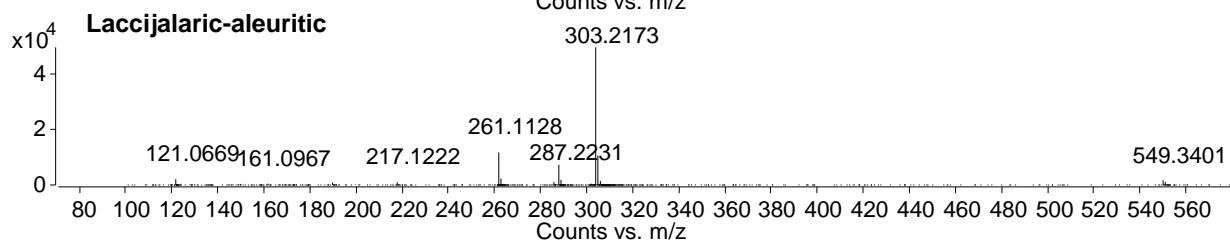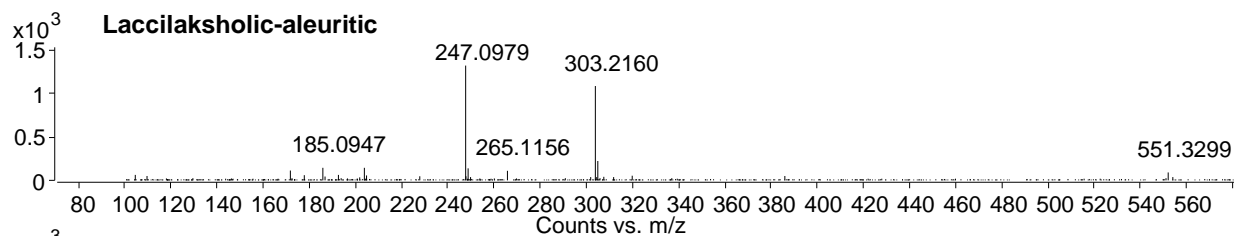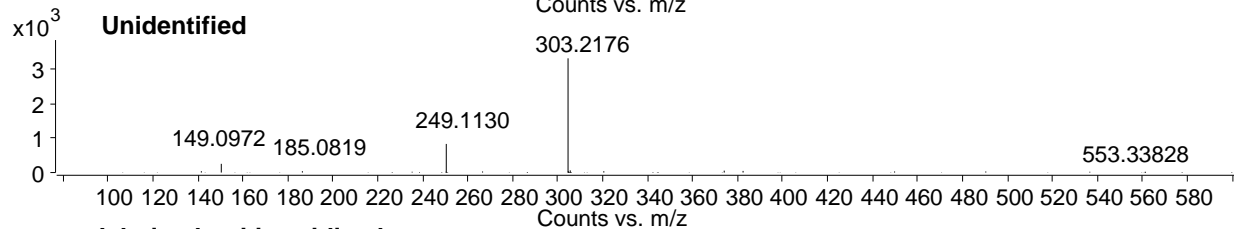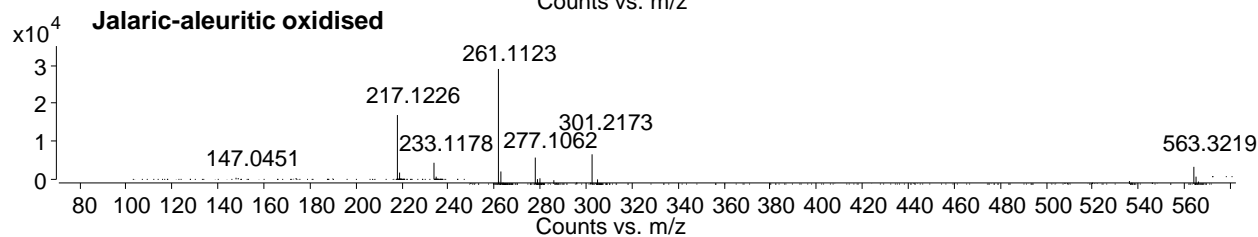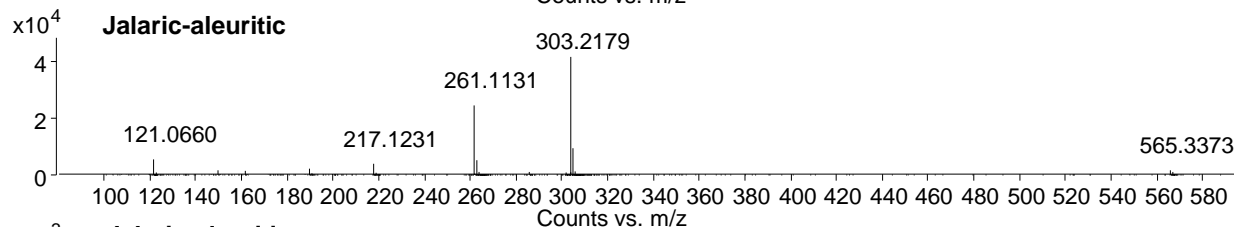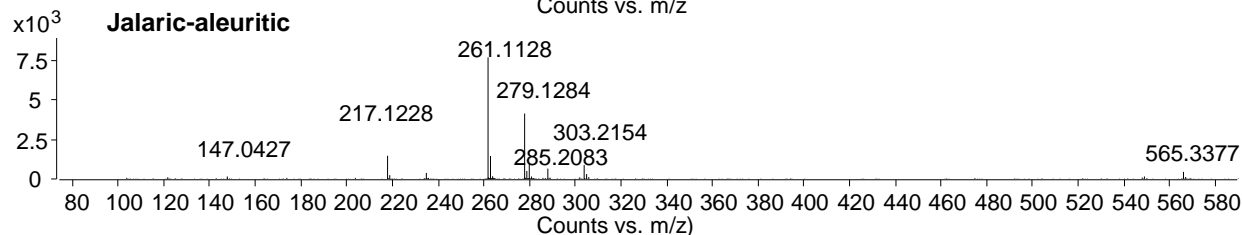



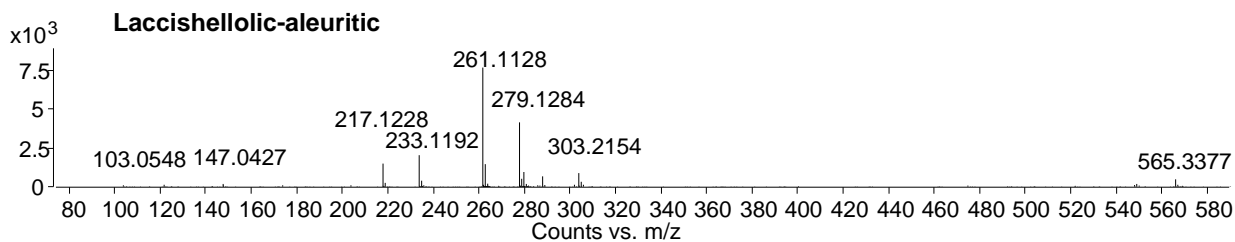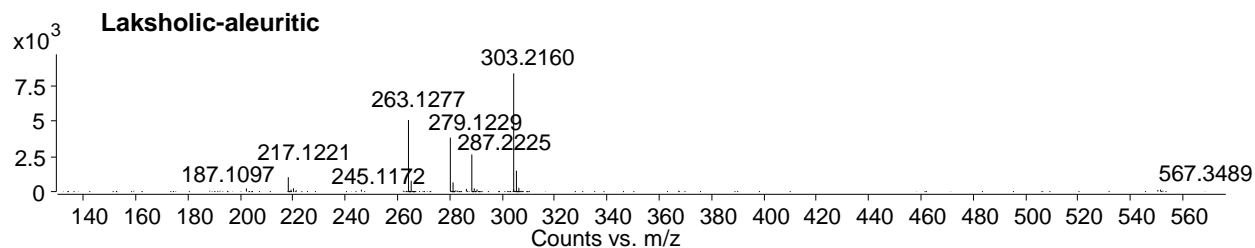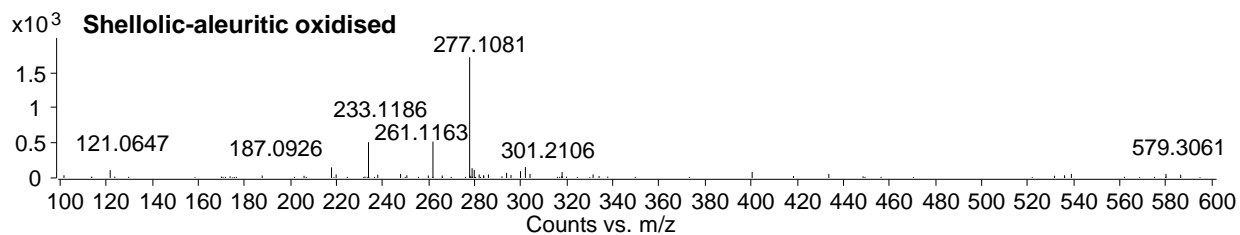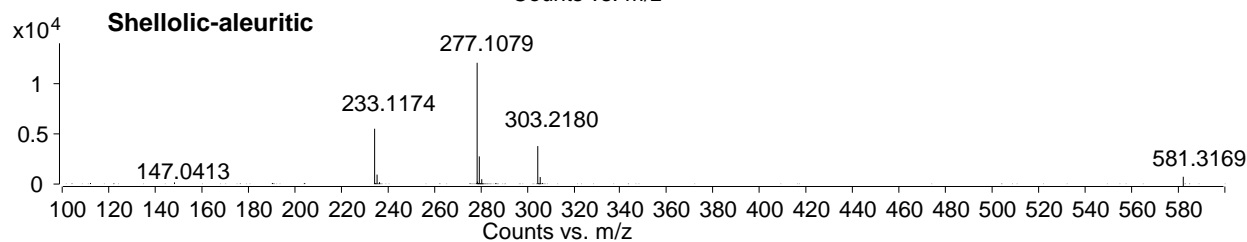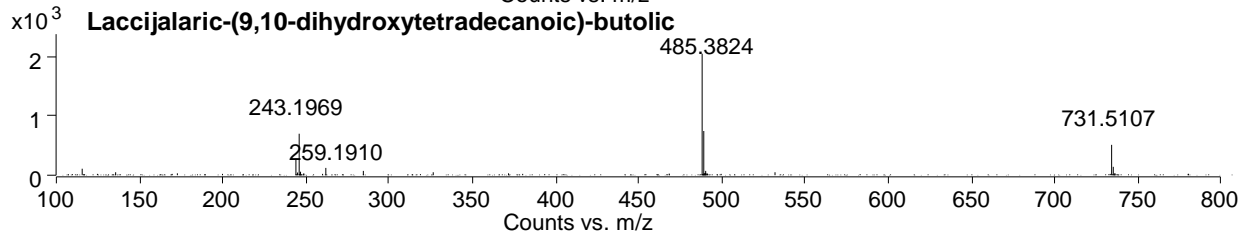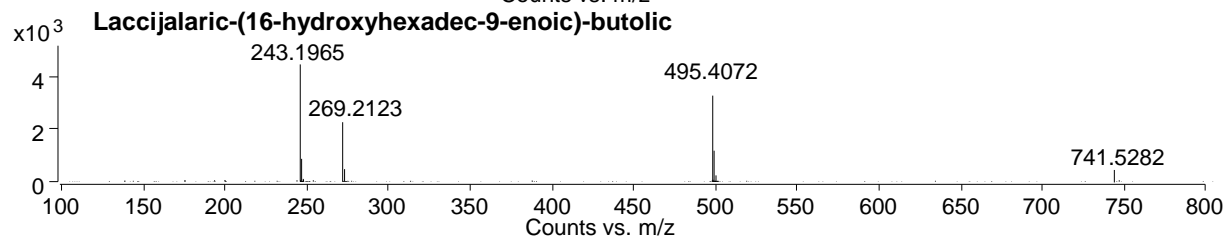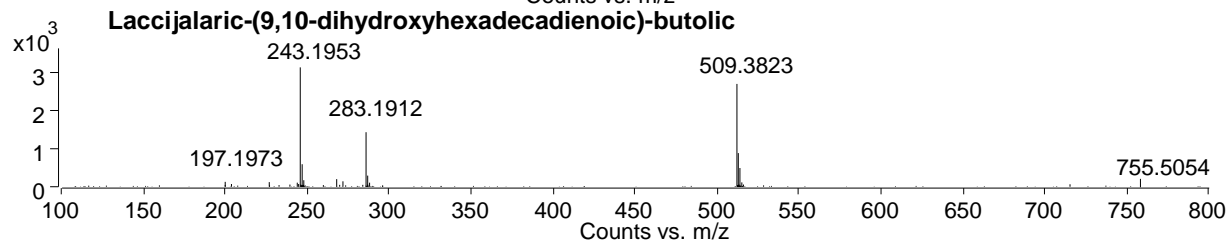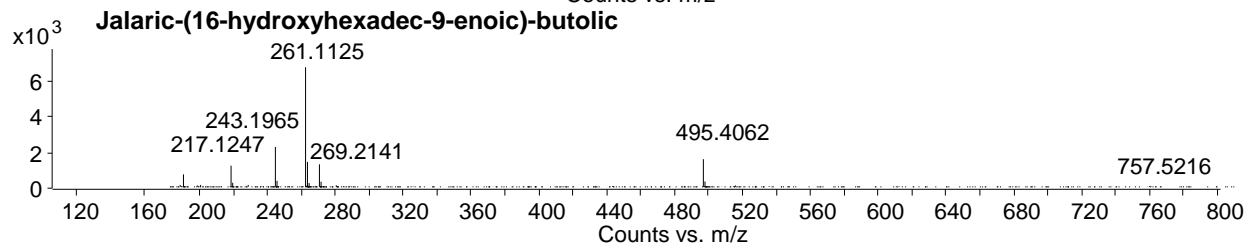

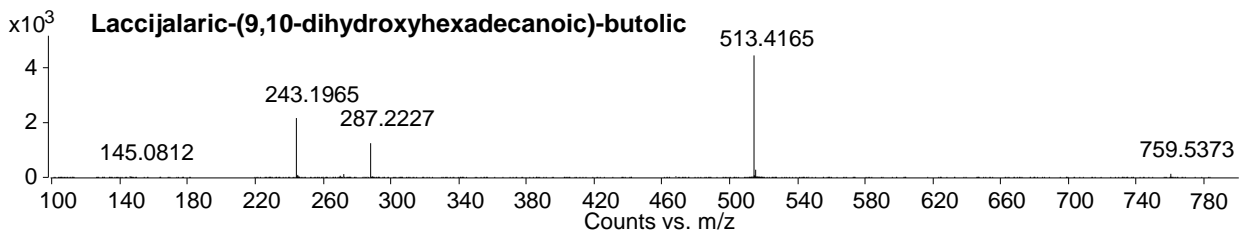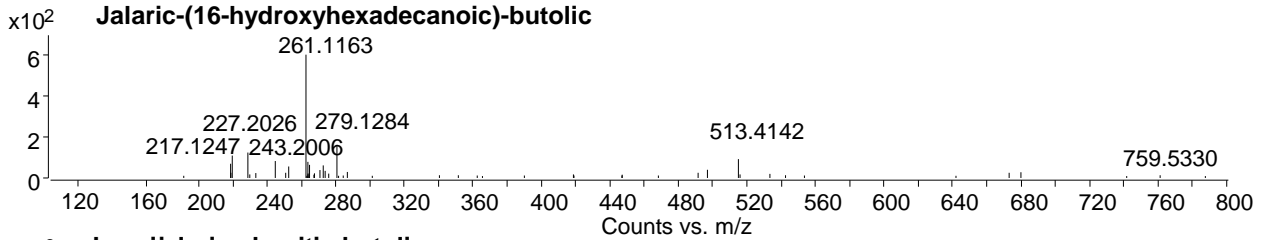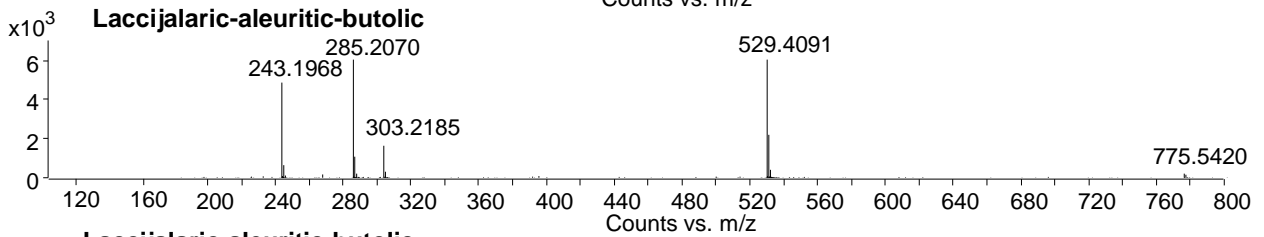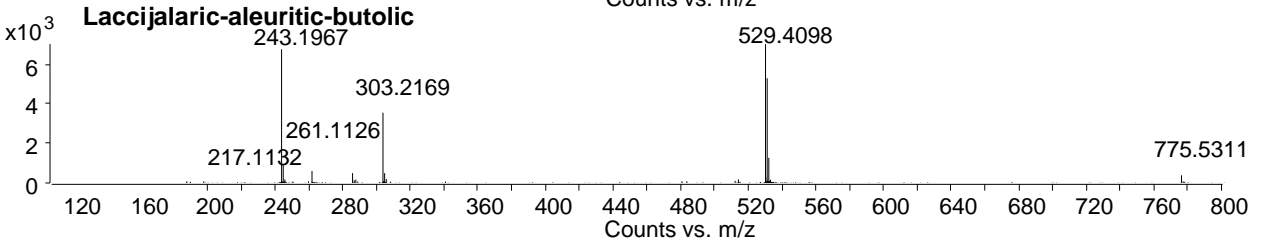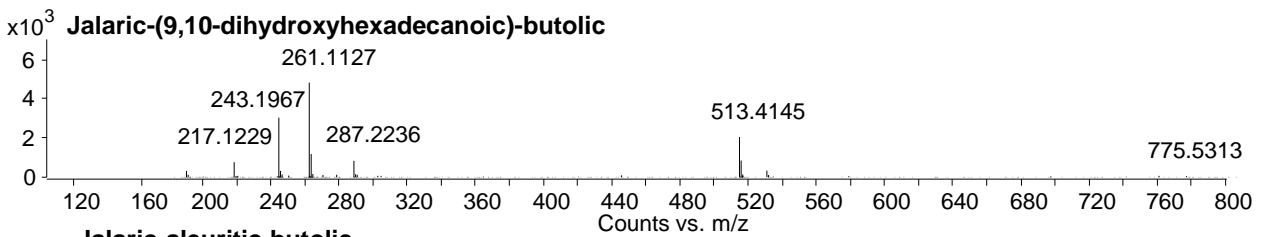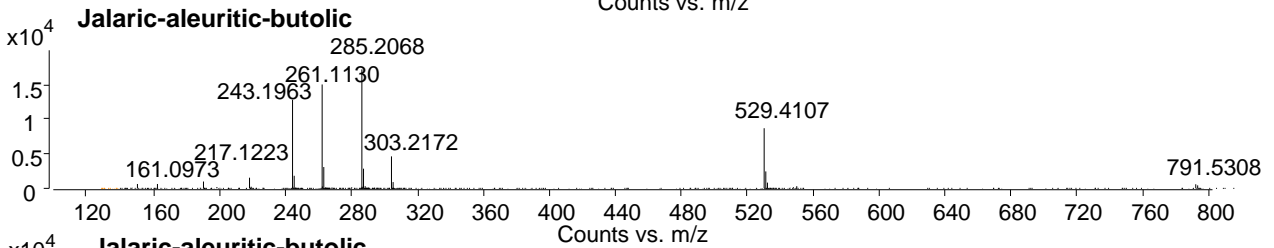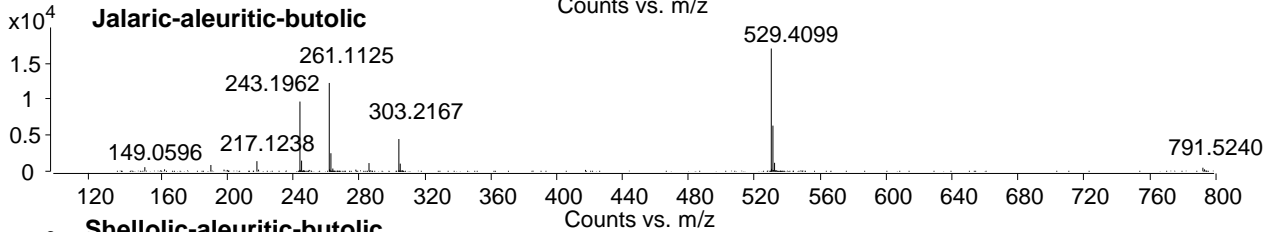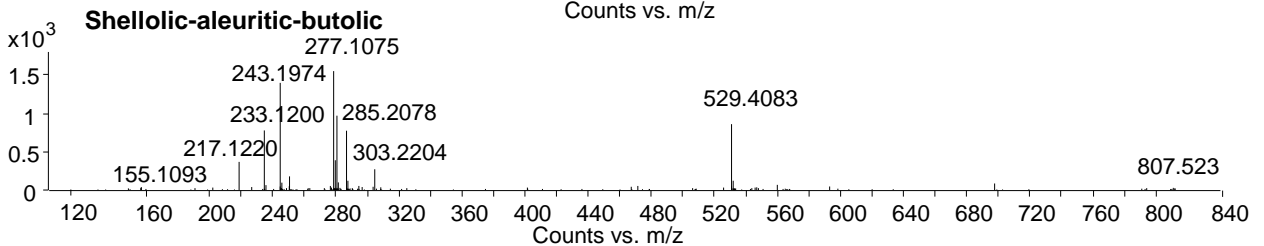

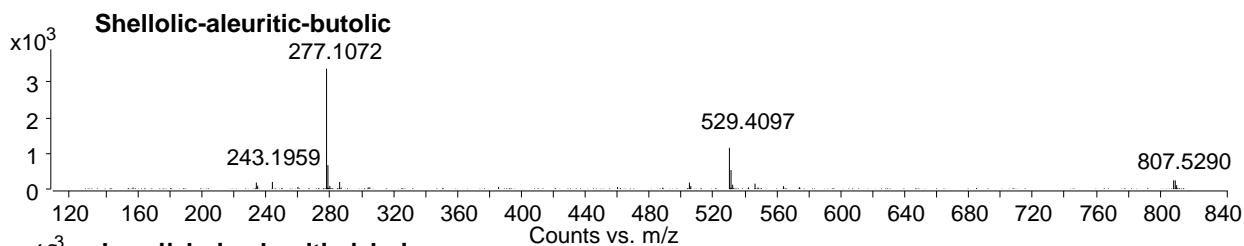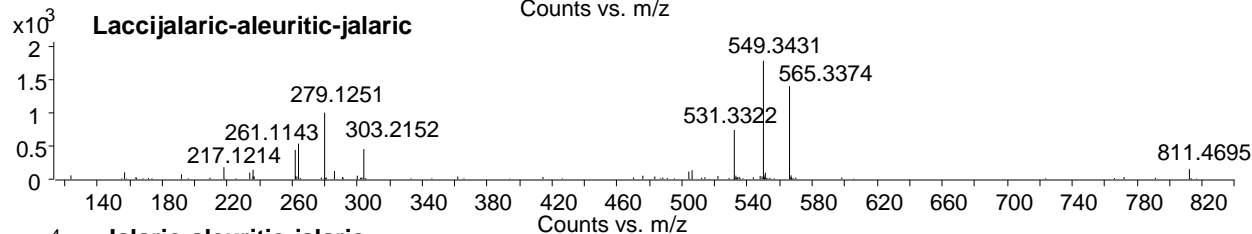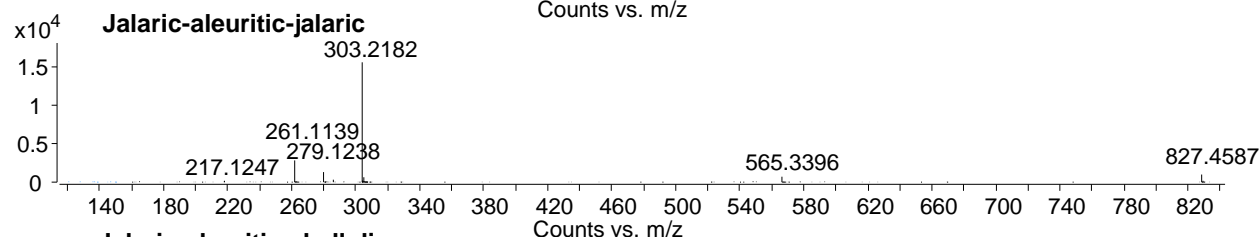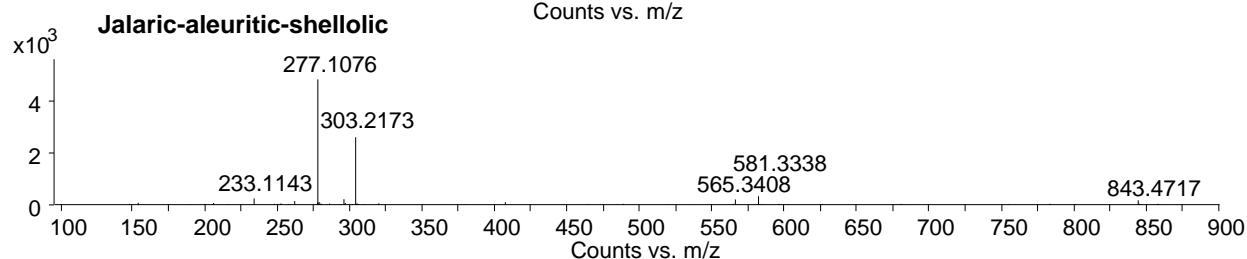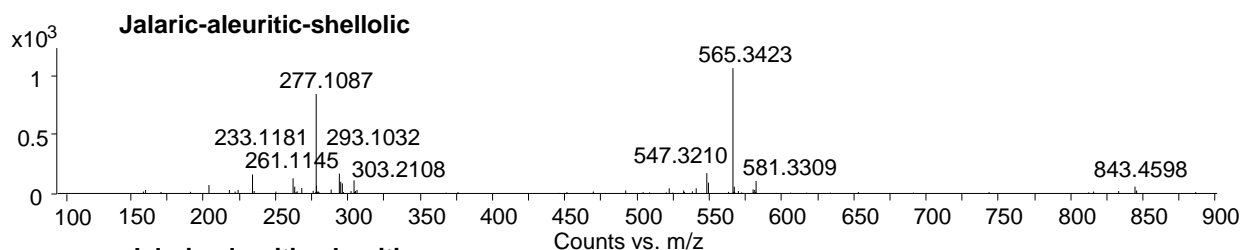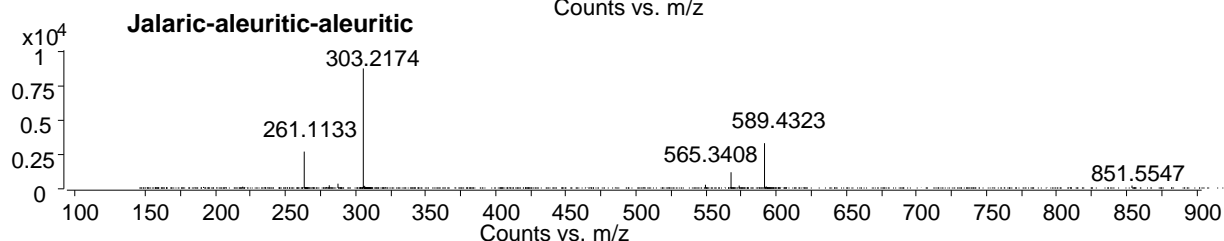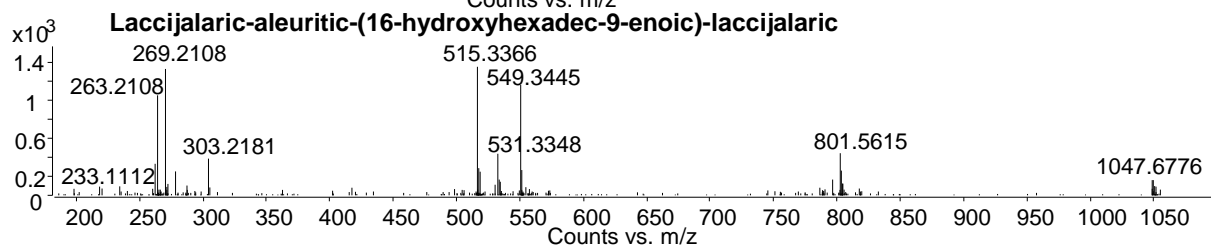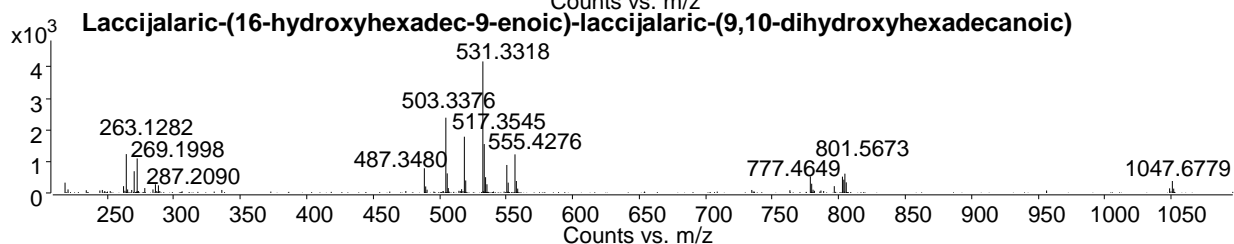

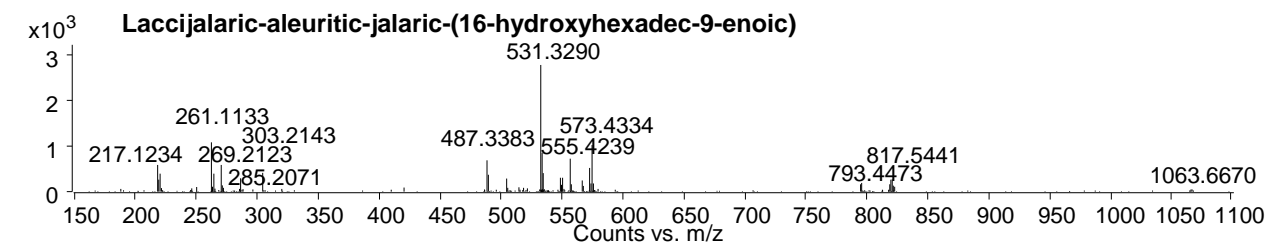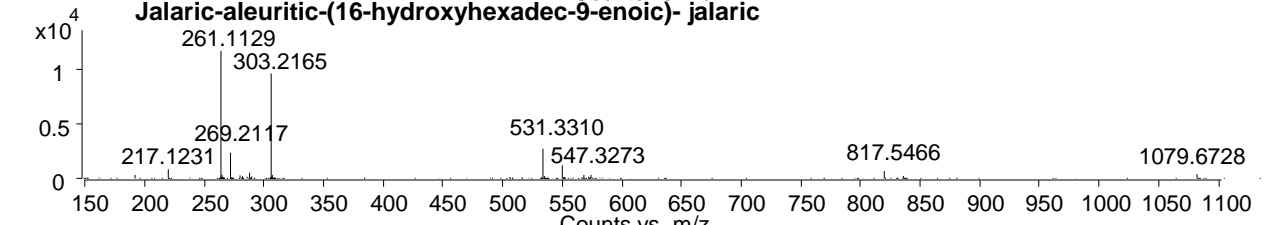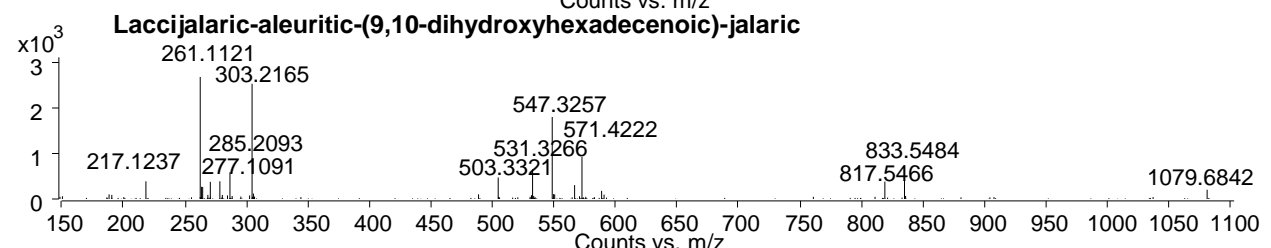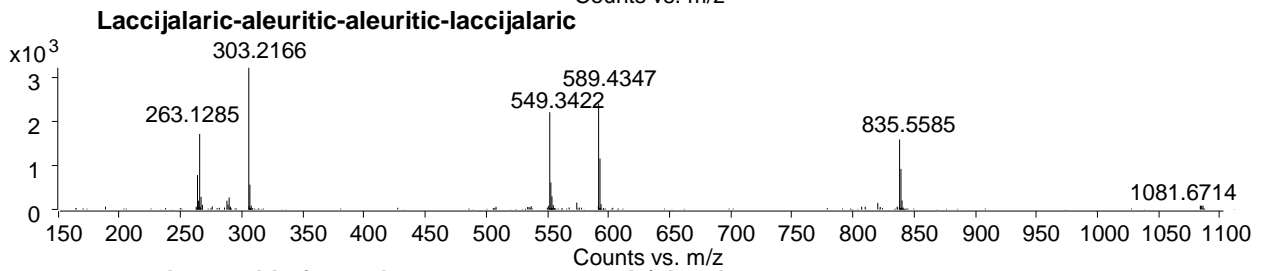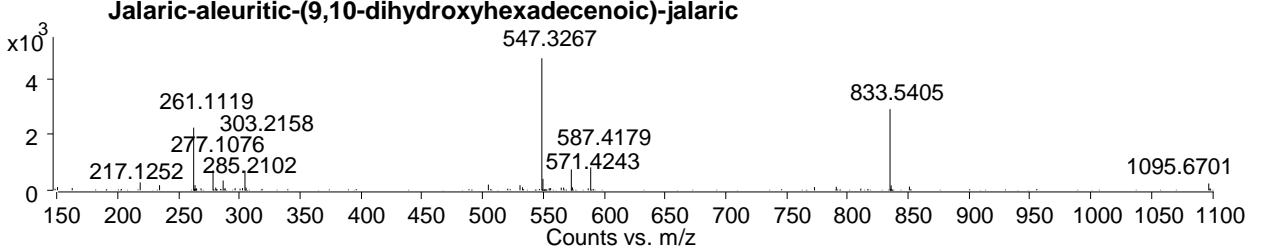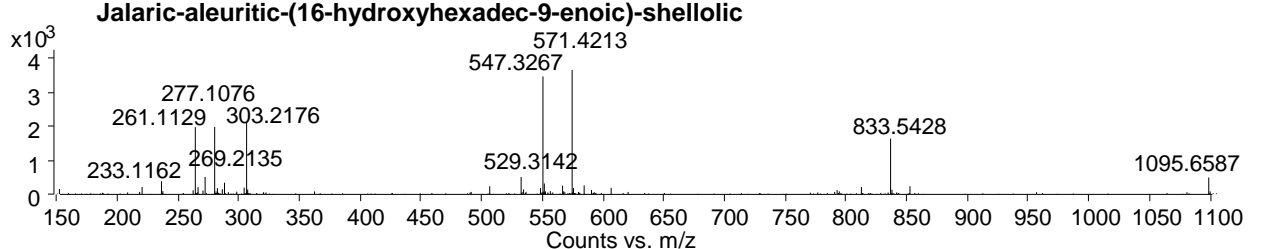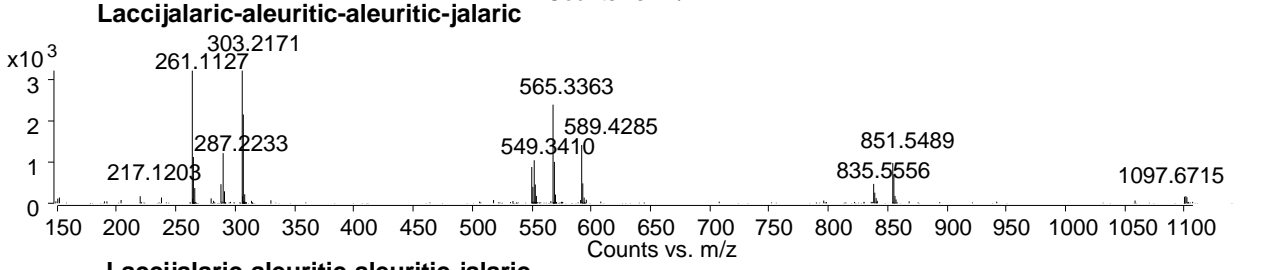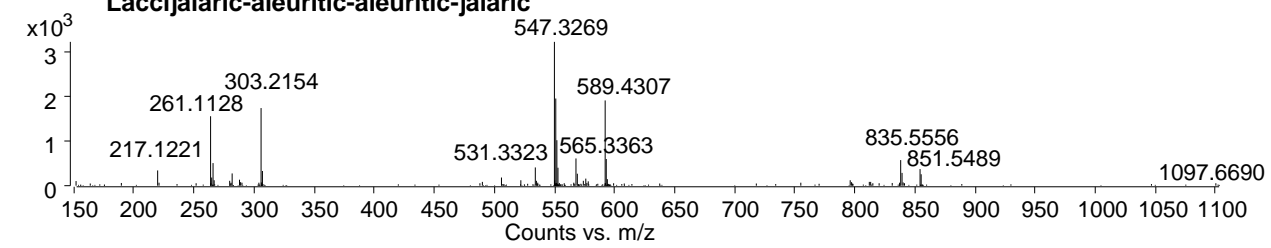

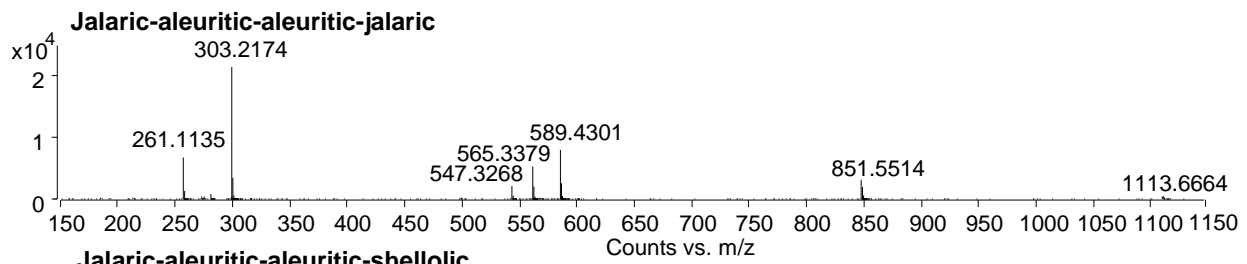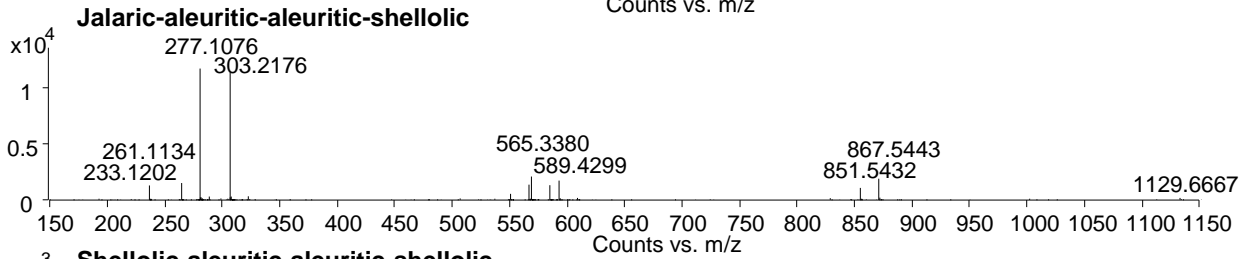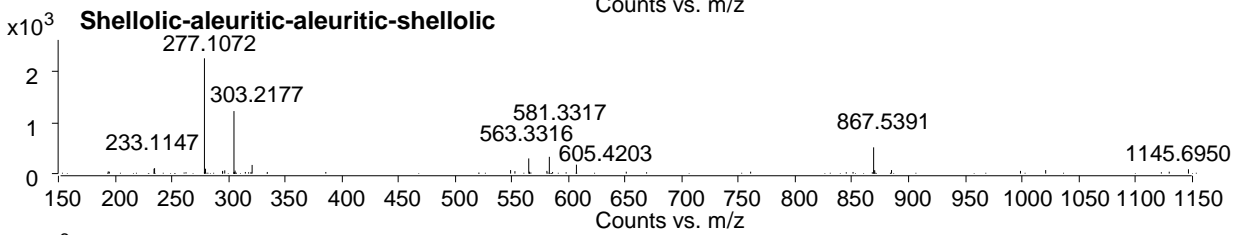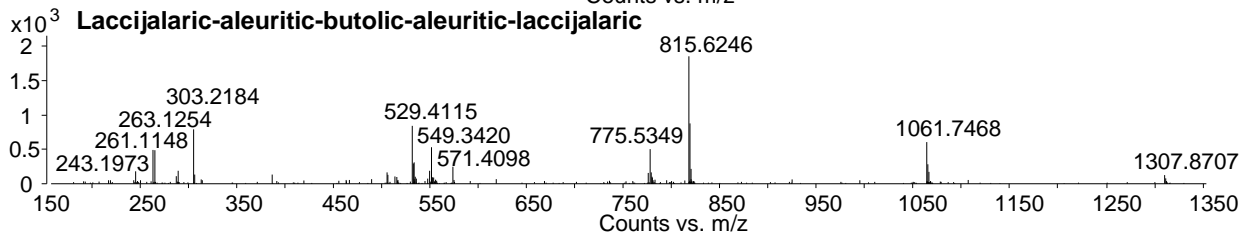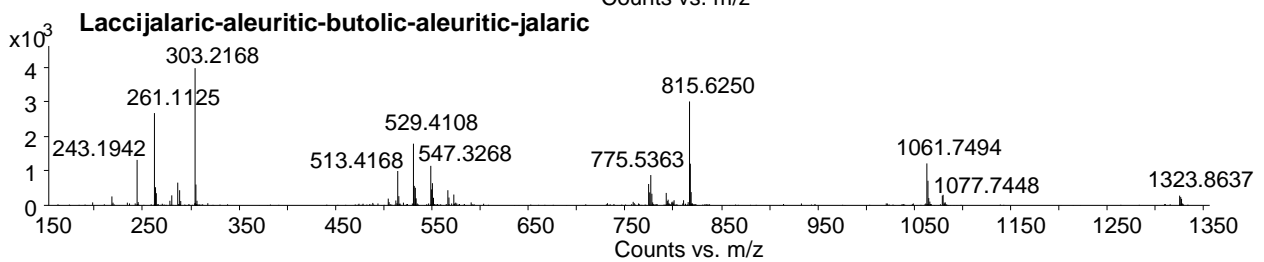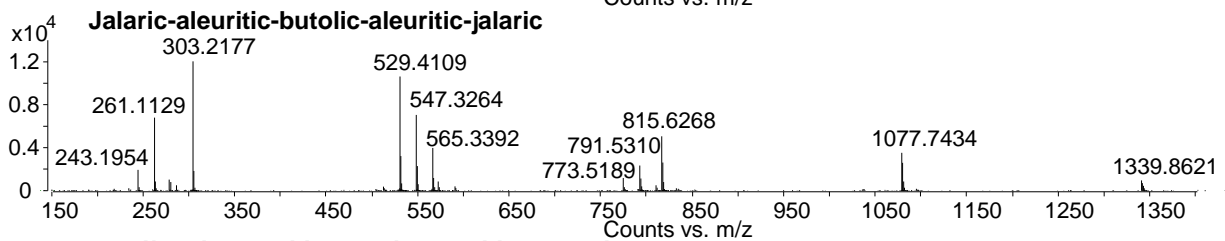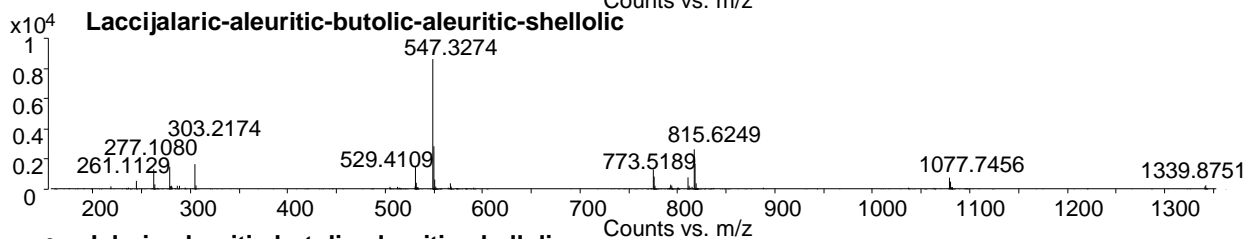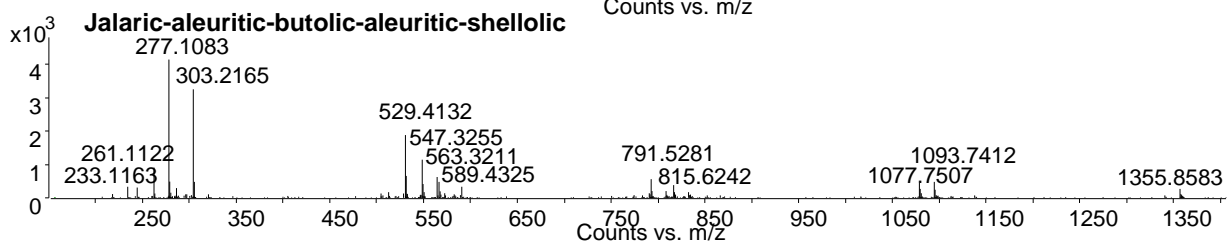

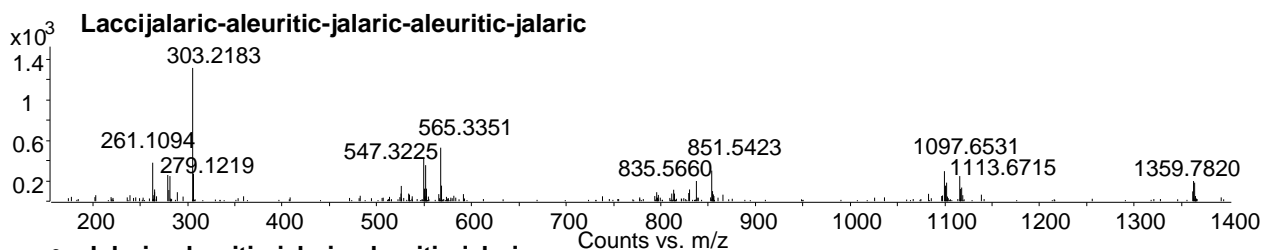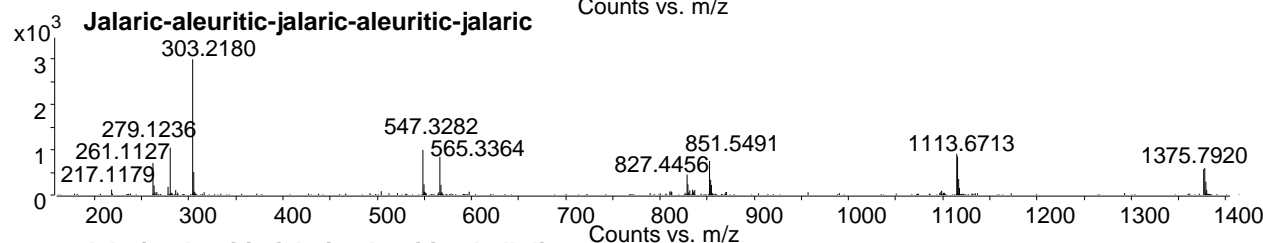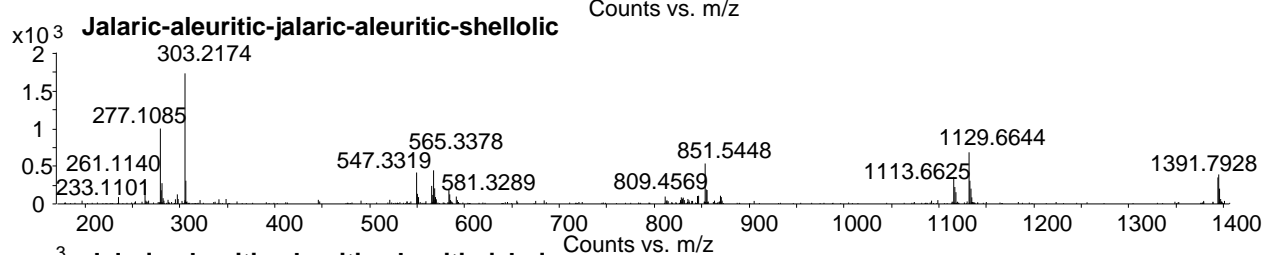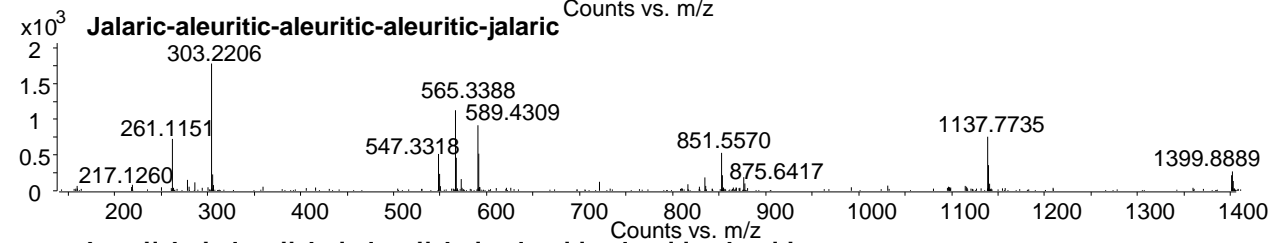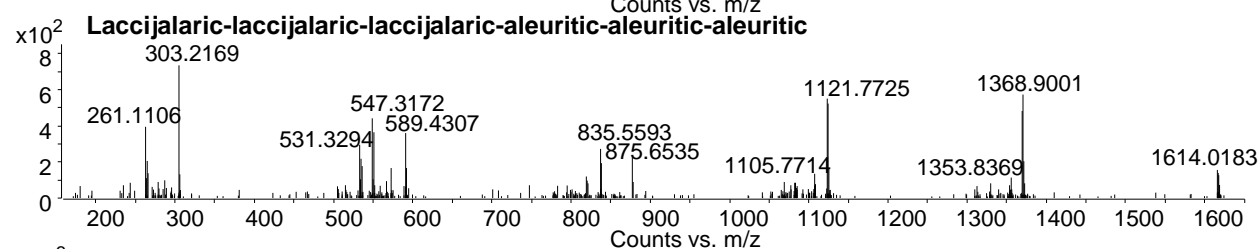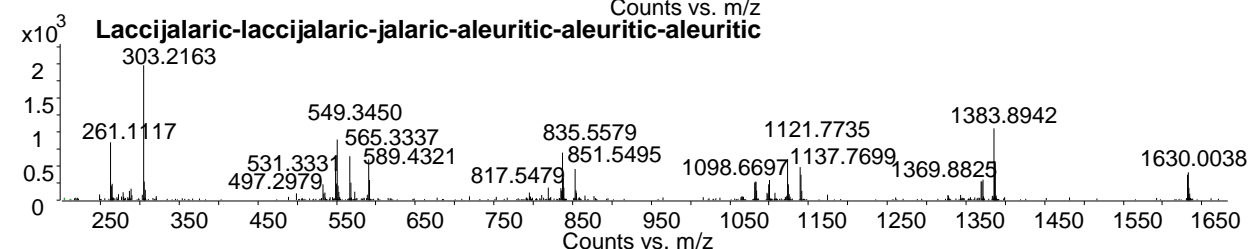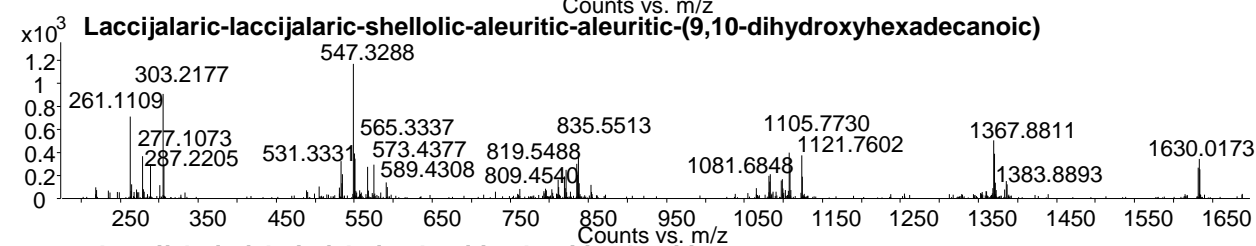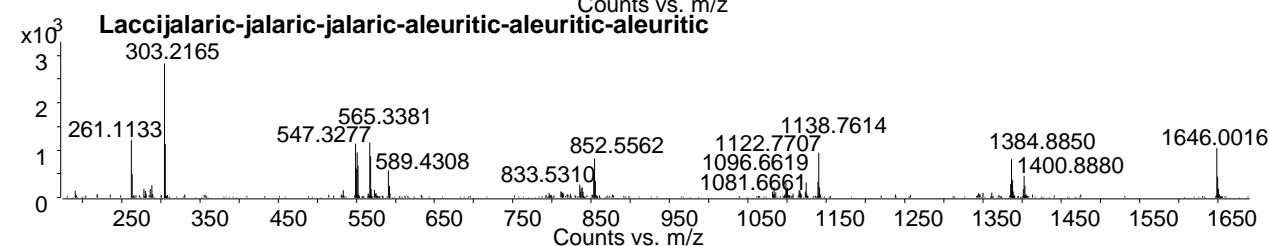

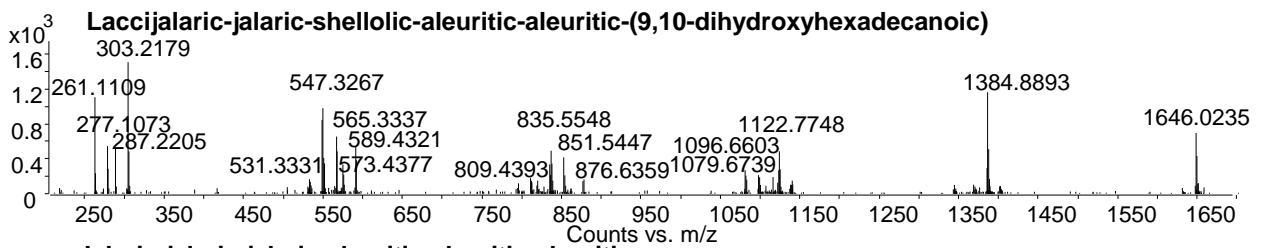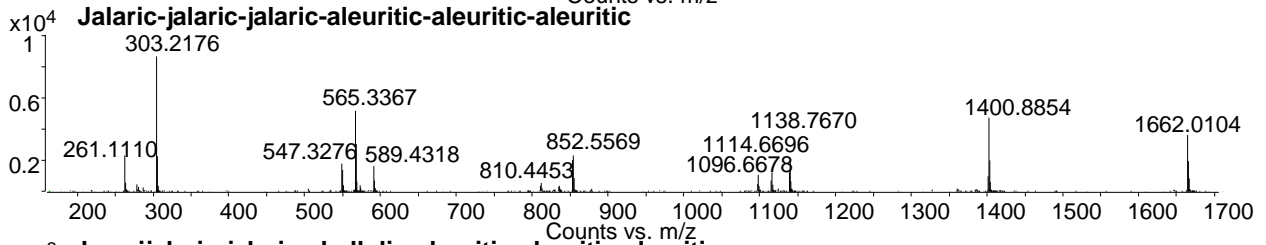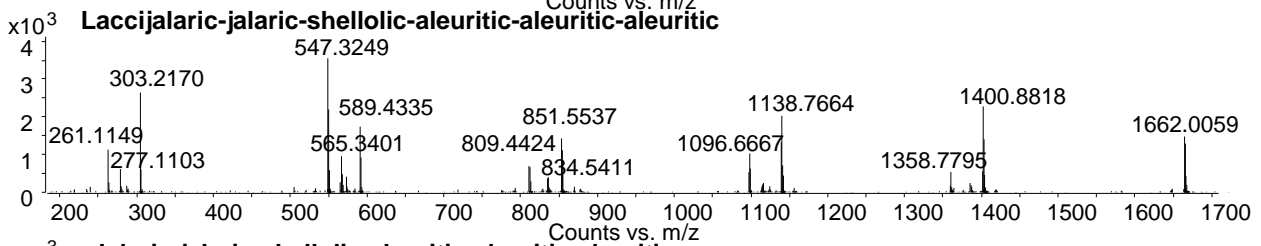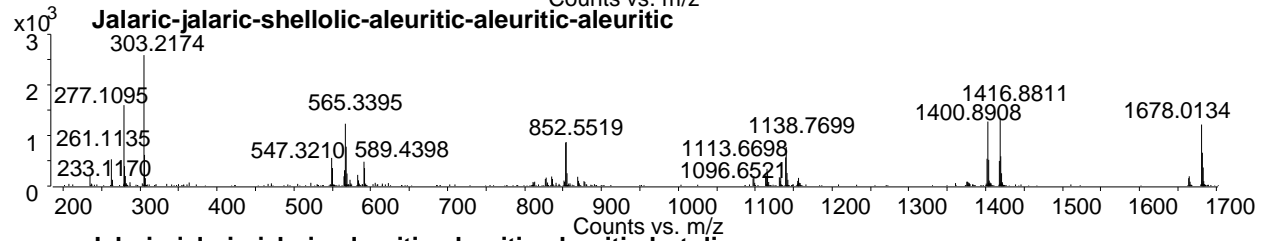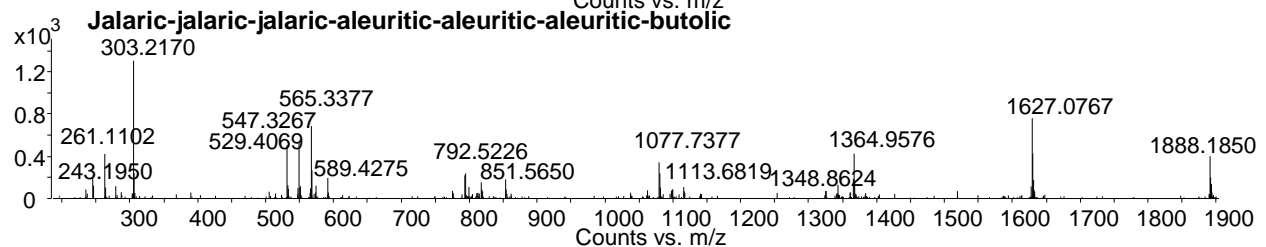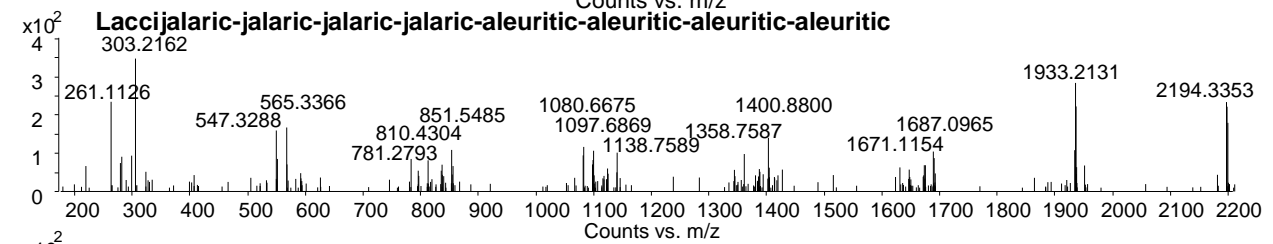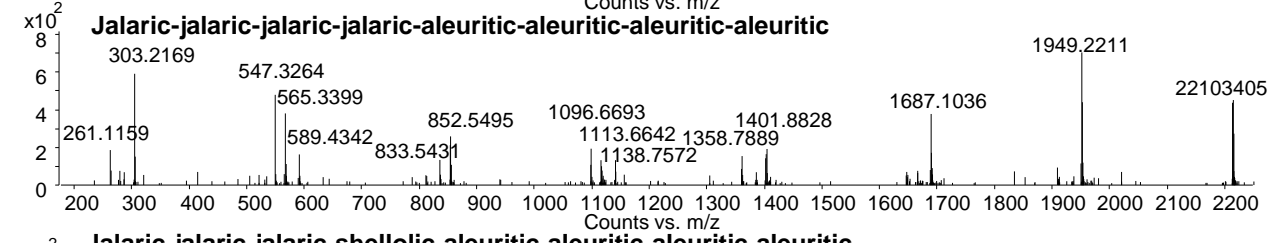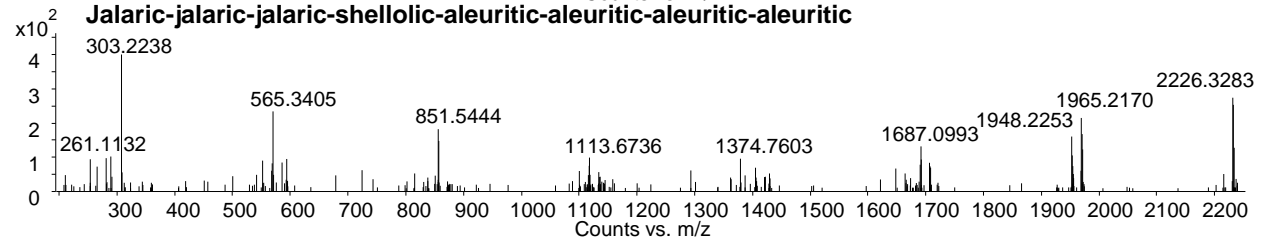

Supplement: 41598_2017_14907_MOESM1_ESM.pdf [file 41598_2017_14907_MOESM1_ESM.pdf]
